# Supplementary material for: Development of Candida autochthonous starter for cigar fermentation via dissecting the microbiome
Source: PubMed Central journal article supplement (PMC9998997; doi:10.3389/fmicb.2023.1138877), 2023-02-24
Supplement: Data_Sheet_1.pdf [file Data_Sheet_1.pdf]

*Supplementary Material*

## Development of *Candida* autochthonous starter for cigar fermentation via dissecting the microbiome

Yun Jia<sup>1,2</sup>, Yuanfa Liu<sup>2</sup>, Wanrong Hu<sup>1</sup>, Wen Cai<sup>1</sup>, Zhaojun Zheng<sup>2</sup>, Cheng Luo<sup>1</sup> and Dongliang Li<sup>1,\*</sup>

\* Correspondence: Dongliang Li: 360188228@qq.com

### 1 Supplementary Figures and Tables

#### 1.1 Supplementary Figures

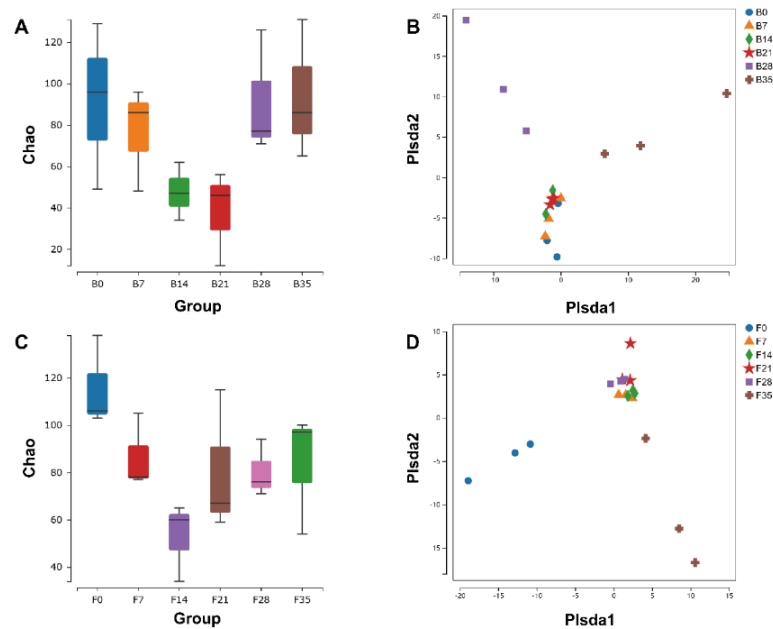

**Supplementary Figure 1.** Microbial diversity analysis. (A) bacterial chao index (B) bacterial PLSDA analysis (C) fungal chao index (D) fungal PLSDA analysis

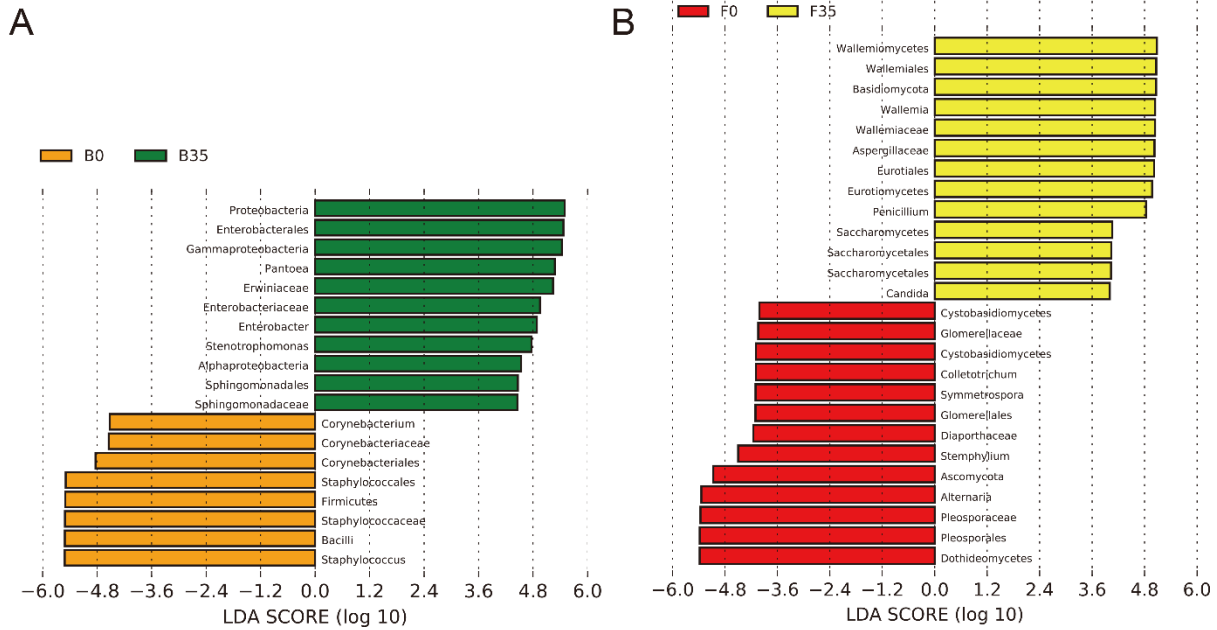

**Supplementary Figure 2.** Microbial biomarkers before and after fermentation. (A) bacteria (B) fungi

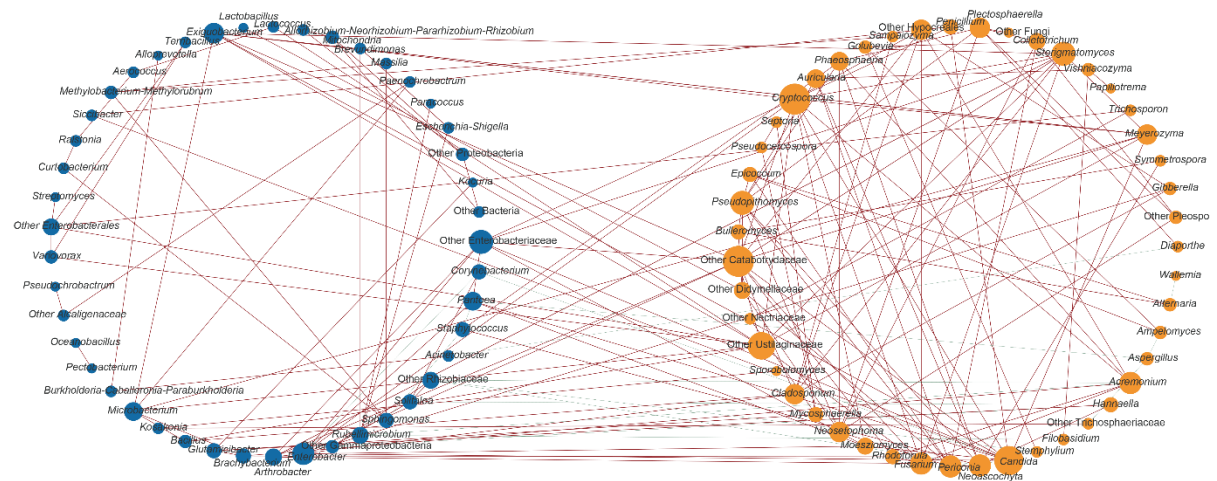

**Supplementary Figure 3.** Correlation network of co-occurrence and co-exclusion relationships between different genera. Statistically significant ( $P < 0.05$ ) Spearman's correlation coefficient ( $|\rho| > 0.6$ ) indicates the robust correlations. The size of nodes indicates the degree of connections. Blue and orange nodes indicate bacteria and fungi respectively. Edge thickness represents the proportional to the value of Spearman's correlation. Green and red edges indicate negative and positive interaction between nodes.

## 1.2 Supplementary Tables

**Supplementary Table 1. Microbial biomarkers before and after fermentation**

| Sample | Kingdom  | Phylum           | Class               | Order               | Family             | Genus                   |
|--------|----------|------------------|---------------------|---------------------|--------------------|-------------------------|
| B0     | Bacteria | Actinobacteriota | Actinobacteria      | Corynebacteriales   | Corynebacteriaceae | <i>Corynebacterium</i>  |
| B0     | Bacteria | Firmicutes       | Bacilli             | Staphylococcales    | Staphylococcaceae  | <i>Staphylococcus</i>   |
| F0     | Fungi    | Ascomycota       | Sordariomycetes     | Glomerellales       | Glomerellaceae     | <i>Colletotrichum</i>   |
| F0     | Fungi    | Basidiomycota    | Cystobasidiomycetes | Cystobasidiomycetes | Symmetrosporaceae  | <i>Symmetrospora</i>    |
| F0     | Fungi    | Ascomycota       | Dothideomycetes     | Pleosporales        | Pleosporaceae      | <i>Stemphylium</i>      |
| F0     | Fungi    | Ascomycota       | Dothideomycetes     | Pleosporales        | Pleosporaceae      | <i>Alternaria</i>       |
| B35    | Bacteria | Proteobacteria   | Gammaproteobacteria | Enterobacterales    | Erwiniaceae        | <i>Pantoea</i>          |
| B35    | Bacteria | Proteobacteria   | Gammaproteobacteria | Enterobacterales    | Enterobacteriaceae | <i>Enterobacter</i>     |
| B35    | Bacteria | Proteobacteria   | Gammaproteobacteria | Xanthomonadales     | Xanthomonadaceae   | <i>Stenotrophomonas</i> |
| F35    | Fungi    | Basidiomycota    | Wallemiomycetes     | Wallemiales         | Wallemiaceae       | <i>Wallemia</i>         |
| F35    | Fungi    | Ascomycota       | Eurotiomycetes      | Eurotiales          | Aspergillaceae     | <i>Penicillium</i>      |
| F35    | Fungi    | Ascomycota       | Saccharomycetes     | Saccharomycetales   | Saccharomycetales  | <i>Candida</i>          |

**Supplementary Table 2. Co-occurring genera<sup>a, b</sup>**

| Genera                       | Degree | Relative abundance |
|------------------------------|--------|--------------------|
| <i>Cryptococcus</i>          | 13     | 0.07%              |
| unclassified Catabotrydaceae | 13     | 0.11%              |
| <i>Candida</i>               | 12     | 0.42%              |
| Unclassified Ustilaginaceae  | 11     | 0.01%              |

<sup>a</sup> The number represented the number of genera coexisting with other genera.

<sup>b</sup> Genera with degree above 10 were defined as co-occurring genera.

## 2 Supplementary data

The raw sequence data reported in this paper have been deposited in the Genome Sequence Archive in the Beijing Institute of Genomics (BIG) Data Center, Chinese Academy of Sciences, under accession numbers CRA014345 and CRA014351 that are publicly accessible at <https://bigd.big.ac.cn/gsa>.
